# Supplementary material for: Vulture, culture and more: putting human-dimensions back in the saddle for conservation policy
Source: Research Square preprint supplement (doi:10.21203/rs.3.rs-505472/v1), 2021-05-10
Supplement: Supplementary file 1 [file 284b1aba7f97d5d4ddc2acc1.docx]

**Supplementary material: 1**

**Vulture, culture and more: putting human-dimensions back in the saddle for conservation policy**

Urvi Gupta, Nishant Kumar

**1. Salient aspects that make Delhi a representative South Asian City**

There are four vital aspects of Delhi that have significant implications for its waste management and characterize the city's human-animal interface. ***First***, Delhi is a historic city. It has undergone multiple disparate phases of urbanization, giving it a physical outlook that is a mosaic of habitat patches with urban tree-cover, which as a factor, is negatively correlated with the extent of built-up space. The latter is an index for human-density1. ***Second***, the opportunistic commensals that capitalise over human-offal, density-variations of wide-ranging species, such as raptors, respond to integrated components of the landscape. They include the urban matrix and its embedded patches of native-vegetation. For large birds, native-vegetation and the system of poor solid waste disposal in the city mutually compensate for vital foraging, nesting, roosting and resting structures, keeping resources unconstrained, which supports extraordinarily dense avian-communities2,3. ***Third***, by virtue of co-occurrence, commensal fauna, people living in suburbs and residents who indulge in informal livelihoods are closely associated with various accumulations of garbage, from ephemeral piles to landfills. Waste, thereby, promotes close interactions with animal scavengers3. People across stakeholder categories offer intentional food subsidies to various species as a cultural practice or patronizing [recipricatory] good-will. Thus, many urban species also featured as symbols of religious veneration- an aspect that varies across the city4–6. Moreover, food processing generates animal remains from state-owned and small-scale, informal meat processing units. Owing to its population size and a per capita income thrice the national average7, Delhi ranks among the highest consumers of animal products (milk and meat) in the country. ***Finally***, while the volume of general waste and animal remains has steadily increased- up by 300% since 2002 in Delhi- waste spaces are progressively more constrained and permissions for new landfill sites have seen spatial contentions8. In turn, these increase the capillary exposure of inhabitants to close contacts with scavenging species, which become scattered throughout the city rather than concentrated at a few large rubbish dumps.

**2. The Salient components of ethnographic surveys**

Names, stories, art and songs associated with avian scavengers helped people symbolise their ambition and virtue, and develop a sense of place. Recognition and affective associations were driven by bird’s vocal repertoire and morphology, and peoples’ geographical backgrounds (immigrants or domicile in the city), type and duration of residency (formal residential blocks or informal establishments/shanties) within a heterogeneously developed city.

People used *panchhi* or *pakshi* to depict avian taxa, and *chidiya* (translated small birds) for the species whose name they did not know. Those classified as professionals in wildlife conservation (n= 14 of the total 71), who were aware of modern systematics for the target species, also had familiarity with the terms of folk-systematics, which they learnt as youngsters. However, amongst the limited sample of young researchers (age <35 years, n= 7), who grew up in urban regions, we identified relatively poor knowledge of folk-systematics, especially with respect to vultures. The morphology and behaviour of the birds comprising colour, size, position of eyes in raptors, beak shape, flight and talons formed the basis of ecological and aesthetic charisma, while folklore and mediatisation were the basis for corporeal charisma9. These drivers of attitudes are closely interrelated with (i) Space and scale of interactions, (ii) temporal activity patterns of animals and people, and (iii) socio-economic condition. For instance, breeding kites mostly attacked only for the two months within the breeding season across November-April, i.e. the time between incubation and fledging of chicks. They nest near human habitations and capitalise on food from waste and ritual feeding by people of *Islamic* faith.

During our interviews, we noticed that amateur bird watchers, experts, and a few elderly people recognised patterned changes in the numbers of crows, kites and vultures during the past 30 years. Untrained respondents confused vulture decline with kite decline. Although folklore described vultures and other carrion-feeding birds as symbols of darkness and death, most respondents expressed grief about the recent declines in the subcontinent's vulture populations. Representatives from stakeholder groups of butchers, waste-workers and municipal workers we interviewed at the three landfills mentioned the dominant presence of vultures before the crash in populations. Currently, the landfills are largely occupied by the migratory populations of kites *Milvus migrans lineatus* from central Asia and other opportunistic scavengers as well as livestock owned by the urban-poor. The vernacular nouns or phrases for the focal species of this research, even by the followers of monotheistic faith, stressed familial inter-relationships that are characteristic of the Indian subcontinent. Specifically:

***Crows*** were the best recognised, and described as opportunistic birds across all age groups and stakeholders. They were appreciated for their intelligence based on folklore (especially “The Crow and the Pitcher, an *Aesop’s fable''*), although none of the respondents witnessed a crow doing an ‘intelligent act’. Their plumage represented darkness and mystery to the people. Crows held cultural significance as messengers of *Yam* (God of Death), vehicle of the Saturn God *Shani* and were also believed to be the dead ancestors’ reincarnated life forms by the respondents of Hinduism-faith. The latter was the prime motivation behind the ritual food people offered to these birds. Most of the respondents discussed the social legend that associated a crow cawing by the entrance with potential arrival of guests. Most stories and couplets with respect to crows were limited to the middle aged and elderly (i.e. 35-80 years age group), and urban immigrants (Supplementary material 2).

***Black Kites*** were the most misidentified bird in the study, correctly addressed by their vernacular name *cheel* only by a handful of the 71 respondents (most of whom were urban immigrants) from non-experts. Only professionals from all stakeholders addressed them as Black Kites. Other respondents majorly misidentified them as eagles, *baaz* (hawk or falcon) or vultures/*giddh*. People above the age of 50, shared memories of kites snatching food from hand. Culturally, they were treated as good omens by *Islamic* community, which promoted ritual feeding of kites. Other communities either perceived them as bad omens, were neutral, or treated them as part of the rest of nature that needs to be respected. Despite attacks by kites during the breeding season, people were compassionate that attacks were to protect their young. However, subjects across all age groups believed that kites would snatch their eyes if they looked at them, although no one had experienced the same.

***Vultures:*** folk perceptions for these erstwhile obligate scavengers were associated with the extinction of experience among young and middle-aged people. Their idea of vultures was readily confused for kites. Senior citizens and professionals had more descriptive memories of the species, and appreciated vultures for their ecosystem services as scavengers and their sharp eyesight and flying capabilities. Egyptian vultures *Neophron percnopterus* were confused with kites (Supplementary material 2). Reasons for vulture decline were attributed to pollution, oestrogen injections to cattle, or unknown technical intervention by the scientists from the United States of America or Japan. People readily shared mythological depictions of vultures from the Hindu epic *Ramayana*.

**3. Emergent dimensions**

Majorly, literature on urban ecology is devoid of discussions on diversity of naturalistic perceptions of people we gathered during the horizon scans and focused interviews. The cultural value of avian scavengers, and animals in general, extended beyond ‘human-utilitarian’ value. This was evident by the prolific mention of common urban birds across multiple stakeholders in the city as shared natural heritage10.

Relating urban fauna with their individual and community heritage created a sense of the fruitful relationship between people, nature and the numinous11. Over four centuries, the complex interplay of colonization, modernization, urbanization, and technification severed many people and nature connections. Current rates of disconnections are unprecedented, given the extinction of experience with respect to crashes in the populations of vultures and sparrows, along with progressive reduction of diversity of birds in the backyard12. People’s psychological and behavioural development is conditioned through interaction with biocultural information13 and these links are increasingly threatened by urbanization, creating lost connections to nature that can translate into the erosion of cultural identities. In the wake of urgent attention to dynamic urban shifts, results from the general discussions and specific interviews with subjects can be broadly discussed along the following four emergent dimensions as the drivers of folk perceptions:

1. **The semantics of Folk Taxonomy**

***Appearance and sound***

Avian scavenger species were described very differently by multiple stakeholders within the general public. Calls and colour formed the basis of bird identification across different groups (Supplementary material 2). Crows had the largest number of names and adnouns in *Hindi* and *Sanskrit*14, consistently evident during the interviews. The etymology of Hindinames for both crow and kite, was based on the call of the bird (Supplementary material 2). Without any hint by us, twenty percent of non-experts mentioned differences between house crow from the thick-billed crow, discussing beak size and shape. While the crow was noticed for its long slender and straight beak, respondents did not elaborate much about kite’s beak but talons. Nineteen respondents who knew only Hindi, confused kites with vultures’ vernacular name, *giddha*, or another generic term, *baaz*, that people use for multiple birds of prey. Respondents, especially those below 35 years old, were unsure about the appearance of vultures, vaguely described by most as large birds with enormous wingspan. This explains why Egyptian vulture was called *safed cheel* or ‘white kite’, given its neck and head differ significantly other old world vultures15. Respondents admittedly mentioned indulgence in zoomorphism when ‘*kala kauwa* or black crow’ was used as moniker for dark-skinned people of same ethnicity16. Except for some occasional mentions about kites and crows as bad omens, they were not feared for their size. Although despised by most of the respondents who saw vultures before decline, due to their bald head and neck, combined with large size and association with the dead, people did not have intentions to harm them.

***Extension of the human familial structure to bird scavengers***

Respondents from the *Muslim* community addressed kites as “*pakshiyon ki Naani”* or ‘the maternal grandmother of all birds’, likely contextualising the agility and the asthetic appeal of kite’s flight , which exuded sophistication and experience. Kites and other raptors show nesting site fidelity that may have supported the plausible public notion of a long life for these facultative and obligate avian scavengers discussed in Hindu scriptures (see below). Furthermore, they addressed Egyptian vultures as “*safed cheel”* or white kite, and “*cheel ki naani”,* or ‘grandmother of kites’, likely motivated by white feathers as a sign of old age; also because of the plumage similarity of juvenile and subadult morphs that resemble kites. These observations are consistent with similar popular legends that discuss other mammalian commensals17, for details. Monotheistic or otherwise, culturally, Indian society is collectivistic and promotes social cohesion and interdependence, evident in unique names to depict paternal and maternal relations, unlike the western societies18. Apparently, the instances of inductive extension of familial relationship amongst common birds can aid urban conservation by promoting the concept of universal brotherhood that includes non-humans, supplicating higher tolerance for animals in the vicinity19–21.

***Ecosystem services: basis for folk characterization of bird scavengers***

Patterns we identified in horizon sampling for the ambiguity of names assigned by citizens to various raptors were most likely driven by the social perception of ecosystem services by multiple opportunistic species within the human-dominated landscapes. For instance, kites were called “eagle” or “*baaz*” due to similarity in plumage and beak shape with eagles that ‘hunt their own prey’. Temple wall paintings depicted animals revered by people as vehicles of Hindu gods, e.g. vulture, crows and kites are one of the nine animal-vehicles for Saturn god *Shani*14. It reaffirmed that socially prevalent ambiguity in naming was driven by overlapping urban niches and ecosystem services, contextualizing their phenotypic, perceptual, ecological and cultural salience. After the crash in the vulture populations that were associated with landfills and carcass dumping sites15, large flocks of migratory kites have claimed those foraging grounds22. Birds associated with carcasses were collectively perceived as bad omen by Hindus. During the scan sampling people correlated vulture-presence with death, assuming they brought devastation and death to the living, substantiating their beliefs with discussing the death of trees where vultures roosted regularly, turning them into snags covered in excreta.

**b. Mediatization of perceptual salience**

“Vultures can see up to 100 *yojans* (equivalent to 1200 km) like *Jatayu* and *Sampati* who flew really high, right into the Sun (vulture brothers from Hindu epic *Ramayana*)”.

Aforementioned mythological belief for vultures’ volant and visual capabilities was ‘believable’ to respondents during horizon scan, given the ability of avian scavengers to quickly locate carcasses. Mythological and anthropomorphised perspectives about several animal species usually modulate perceptions accrued in actual encounters (Fukano et al., 2020) (Fig 1c). Patterns in horizon scans illustrated the advent of televised media, especially the possibility of visually depicting general fiction and mythologies: *Jungle book, Ramayana, Mahabharata,* have aided in the visualisation of characters that were previously limited till imagination or artistic expressions23. Within Indian society, multiple languages contextualise keen sense of sight in vultures and kites when zoomorphising fellow citizens in metaphors for sharp eyesight or focus. Feeding gregariously, or being opportunistic on weak and perishable like vultures are other ways where these birds feature in usual conversations.

Beyond the consistent religious impacts contextualising commensals in the region, the horizon scans revealed that perception-homogeneity was also a product of fictitious opinions circulated through the internet, visual and print media24,25. For instance, 83% of interviewees (n = 71) based their notions about superior cognition of house crow from *Aesop’s Fables*, often depicted pictorially for children. Folk stories had connotations about bird migrations that likely influenced our respondents in believing the fake news associated with the decline in vultures. In the absence of adequate advocacy to prevent the use of diclofenac, urban poor, who were livestock owners, linked these decline with “technological intervention by foreign-scientists, who took the birds to the United States of America, China or to Japan”, citing local newspapers and social media26,27 (Fig 2c). A similar belief linked a decline in the number of sparrows with radiation from cellular network towers and pollution. We believe that the popularity of these stories and fables often contributed to the homogenization of perceptions about urban animals. Therefore, we also identify the positive potential of mediatisation in further strengthening of patronizing perceptions that may contribute to the preservation of socio-cultural and ecological uniqueness of tropical megacities.

**c. Inductive opinions and folk stories abstracting social-ecological experiences**

Folk perceptions and inductive opinions that help people identify discontinuities in the environment holds importance in rapidly urbanising systems like Delhi28–31. Our horizon scans suggested that eco-cultural stories, which are inherited along the generations and obliquely within the society were major practiced forms of induction and anthropomorphism e.g. *Aesop’s fable*, *Panchtantra*, etc.32–34 (see Table 1)*.* We argue that the diversity of interactions depicted in such eco-cultural stories, as components of biocultural heritage, was a good index of their synurbic levels35, depicting variations in anthropophily that is coproduced via centuries of coexistence (Table 1). For instance, crows can withstand human proximity and exhibit higher tolerance for people, consistent with the diversity of their vernacular names and fables. In other words, the function of fiction is abstraction of social-ecological experiences that mirror the frequencies of significant interaction events. For instance, even when none of our respondents got their eyes injured by kites (or knew of a person whose eyes were lost to kite-attacks), these birds were popularly vilified as eye-snatchers.

References

1. Paul, S. & Nagendra, H. Vegetation change and fragmentation in the mega city of Delhi: mapping 25 years of change. *Appl. Geogr.* **58**, 153–166 (2015).

2. Kumar, N. *et al.* The population density of an urban raptor is inextricably tied to human cultural practices. *Proc. R. Soc. B Biol. Sci.* **286**, (2019).

3. Kumar, N., Singh, A. & HarRiss-White, B. Urban waste and the human-animal interface in Delhi. *Econ. Polit. Wkly.* **54**, (2019).

4. Kumar, N. *et al.* Habitat selection by an avian top predator in the tropical megacity of Delhi: human activities and socio-religious practices as prey-facilitating tools. *Urban Ecosyst.* **21**, 339–349 (2018).

5. Kumar, N., Jhala, Y. V, Qureshi, Q., Gosler, A. G. & Sergio, F. Human-attacks by an urban raptor are tied to human subsidies and religious practices. *Sci. Rep.* **9**, 2545 (2019).

6. Taneja, A. V. Saintly animals: the shifting moral and ecological landscapes of North India. *Comp. Stud. South Asia, Africa Middle East* **35**, 204–221 (2015).

7. Ministry of Finance, G. of I. Economic Survey 2018-19. (2019).

8. SCS Engineers, and A. A. *No TitleGhazipur Landfill Rehabilitation Report,” prepared for East Delhi Municipal Corporation, on behalf of US Environmental Protection Agency and Climate and Clean Air Coalition Municipal Solid Waste Initiative*. https://www.ccacoalition.org/sites/default/files/resources/2018_Ghazipur-Landfill-Rehabilitation-Report_SCS-Engineers.pdf (2017).

9. Lorimer, J. Nonhuman charisma. *Environ. Plan. D Soc. Sp.* **25**, 911–932 (2007).

10. Maffi, L. *On biocultural diversity: Linking language, knowledge, and the environment*. (Smithsonian Institution Press, 2001).

11. Tidemann, S. C. & Gosler, A. *Ethno-Ornithology: birds, indigenous peoples, culture and society*. (Earthscan, 2012).

12. Louv, R. *Last child in the woods: Saving our children from nature-deficit disorder*. (Algonquin books, 2008).

13. Angel, S., Parent, J., Civco, D. L., Blei, A. & Potere, D. The dimensions of global urban expansion: Estimates and projections for all countries, 2000–2050. *Prog. Plann.* **75**, 53–107 (2011).

14. Dave, K. N. *Birds in Sanskrit Literature: With 107 Bird Illustrations*. (Motilal Banarsidass Publishe, 2005).

15. Naoroji, R. *Birds of prey of the Indian subcontinent*. (Om Books International, 2007).

16. Mishra, N. India and colorism: The finer nuances. *Wash. U. Glob. Stud. L. Rev.* **14**, 725 (2015).

17. Dhee, Athreya, V., Linnell, J. D. C., Shivakumar, S. & Dhiman, S. P. The leopard that learnt from the cat and other narratives of carnivore–human coexistence in northern India. *People Nat.* **1**, 376–386 (2019).

18. Chadda, R. K. & Deb, K. S. Indian family systems, collectivistic society and psychotherapy. *Indian J. Psychiatry* **55**, S299 (2013).

19. Pretty, J. *et al.* The intersections of biological diversity and cultural diversity: towards integration. *Conserv. Soc.* **7**, 100–112 (2009).

20. Beaudreau, A. H., Levin, P. S. & Norman, K. C. Using folk taxonomies to understand stakeholder perceptions for species conservation. *Conserv. Lett.* **4**, 451–463 (2011).

21. Medin, D. L. & Bang, M. The cultural side of science communication. *Proc. Natl. Acad. Sci.* **111**, 13621–13626 (2014).

22. Kumar, N. *et al.* GPS-telemetry unveils the regular high-elevation crossing of the Himalayas by a migratory raptor: implications for definition of a “Central Asian Flyway”. *Sci. Rep.* **10**, 1–9 (2020).

23. Rajagopal, A. The Indian public sphere: readings in media history. (2009).

24. Barua, M. Whose issue? Representations of human-elephant conflict in Indian and international media. *Sci. Commun.* **32**, 55–75 (2010).

25. Thaler, A. D. & Shiffman, D. Fish tales: Combating fake science in popular media. *Ocean Coast. Manag.* **115**, 88–91 (2015).

26. Blokhin, I. N. & Ilchenko, S. N. Fake as a format of modern journalism: the information reliability problem. *Indian J. Sci. Technol.* **8**, 84840 (2015).

27. Udeze, S. E. & Uzuegbunam, C. Sensationalism in the media: The right to sell or the right to tell. *J. Commun. Media Res.* **5**, 69–78 (2013).

28. Atran, S. Folk biology and the anthropology of science: Cognitive universals and cultural particulars. *Behav. Brain Sci.* **21**, 547–569 (1998).

29. Lopez, A., Atran, S., Coley, J. D., Medin, D. L. & Smith, E. E. The tree of life: Universal and cultural features of folkbiological taxonomies and inductions. *Cogn. Psychol.* **32**, 251–295 (1997).

30. Raven, P. H., Berlin, B. & Breedlove, D. E. The origins of taxonomy. *Science (80-. ).* **174**, 1210–1213 (1971).

31. Gupta, U., Qureshi, Q. & Kumar, N. Folk perceptions for avian scavengers in a tropical megacity: implications for biocultural conservation. (2020).

32. Anderson, J. L. Stone‐age minds at work on 21st century science: how cognitive psychology can inform conservation biology. *Conserv. Pract.* **2**, 18–27 (2001).

33. Medin, D. L. & Atran, S. The native mind: biological categorization and reasoning in development and across cultures. *Psychol. Rev.* **111**, 960 (2004).

34. Bang, M., Medin, D. L. & Atran, S. Cultural mosaics and mental models of nature. *Proc. Natl. Acad. Sci.* **104**, 13868–13874 (2007).

35. Hulme-Beaman, A., Dobney, K., Cucchi, T. & Searle, J. B. An ecological and evolutionary framework for commensalism in anthropogenic environments. *Trends Ecol. Evol.* **31**, 633–645 (2016).
